# Supplementary material for: Oscillation-specific nodal alterations in early to middle stages Parkinson’s disease
Source: Transl Neurodegener. 2019 Nov 15;8:36. doi: 10.1186/s40035-019-0177-5 (PMC6857322; doi:10.1186/s40035-019-0177-5)
Supplement: Supplementary file 1 — Additional file 1. Statistical data for the distribution of nodal properties among different oscillatory frequencies in PD patients and controls. [file 40035_2019_177_MOESM1_ESM.xlsx]

## Sheet: Sheet1
Table 1. Statistical data for the distribution of nodal properties among different oscillatory requecncies in PD patients and controls
Cerebral lobe	Nodes	Name	Degree centrality in normal controls						Degree centrality in PD patients						Nodal efficiency in normal controls						Nodal efficiency in PD patients						Betweenness centrality in normal controls						Betweenness centrality in PD patients
			Slow-5 vs. Slow-4		Slow-5 vs. Slow-3		Slow-4 vs. Slow-3		Slow-5 vs. Slow-4		Slow-5 vs. Slow-3		Slow-4 vs. Slow-3		Slow-5 vs. Slow-4		Slow-5 vs. Slow-3		Slow-4 vs. Slow-3		Slow-5 vs. Slow-4		Slow-5 vs. Slow-3		Slow-4 vs. Slow-3		Slow-5 vs. Slow-4		Slow-5 vs. Slow-3		Slow-4 vs. Slow-3		Slow-5 vs. Slow-4		Slow-5 vs. Slow-3		Slow-4 vs. Slow-3
			p value	t value	p value	t value	p value	t value	p value	t value	p value	t value	p value	t value	p value	t value	p value	t value	p value	t value	p value	t value	p value	t value	p value	t value	p value	t value	p value	t value	p value	t value	p value	t value	p value	t value	p value	t value
Frontal lobe	FP.L	Frontal Pole	0.723844	-0.35618	0.1923	-1.32945	0.286517	-1.08231	0.0547624	-1.94699	0.00876209	-2.68176	0.528539	-0.632777	0.374084	-0.900356	0.176947	-1.37801	0.530298	-0.633853	0.0116009	-2.5786	0.0453791	-2.03031	0.539092	0.616625	0.500599	0.680605	0.21513	-1.26246	0.0978526	-1.70079	0.633566	-0.478399	0.0261818	-2.26212	0.0602198	-1.90397
	FP.R	Frontal Pole	0.141829	-1.50292	0.0123793	-2.63737	0.0286358	-2.28269	0.181264	-1.34767	0.00439218	-2.92498	0.105917	-1.63379	0.0459535	-2.06941	0.0122424	-2.6419	0.116697	-1.60856	0.0534973	-1.95748	0.0192144	-2.38574	0.873137	-0.160146	0.0650114	1.90509	0.111279	-1.63373	0.00223911	-3.29846	0.276308	-1.09553	0.0248277	-2.28365	0.26737	-1.11629
	F1.L	Superior Frontal Gyrus	0.124934	-1.57206	0.783806	0.276479	0.0625095	1.92406	0.0752131	-1.80071	0.174214	1.37	0.000350933	3.72116	0.0391765	-2.14263	0.96937	-0.0386742	0.0290765	2.27597	0.0126587	-2.54596	0.325748	0.988296	7.88131e-05	4.14438	0.552466	-0.599857	0.0867628	1.76223	0.00693792	2.86889	0.81435	0.235531	0.0559926	1.93698	0.0769832	1.78969
	F1.R	Superior Frontal Gyrus	0.0831505	-1.78367	0.991094	-0.0112428	0.0677577	1.88498	0.057	-1.92893	0.286892	1.07154	0.00171431	3.23617	0.0455	-2.074	0.804349	-0.249609	0.049315	2.03656	0.00914088	-2.66638	0.254888	1.14612	0.000380647	3.6973	0.440123	-0.78088	0.0626933	1.92264	0.007138	2.85773	0.441884	-0.772547	0.0366078	2.12285	0.00399595	2.95722
	F2.L	Middle Frontal Gyrus	0.152303	-1.46332	0.428816	-0.80051	0.491349	0.695476	0.577725	-0.558812	0.387152	0.869159	0.158518	1.42229	0.0314646	-2.24108	0.218637	-1.25265	0.236476	1.20451	0.0765231	-1.79254	0.45464	0.751066	0.0219463	2.33317	0.560272	0.588053	0.19038	1.33536	0.488907	0.699428	0.093431	1.69616	1.79466e-06	5.1223	0.00630262	2.79956
	F2.R	Middle Frontal Gyrus	0.352024	-0.94324	0.132122	-1.54178	0.569733	-0.573859	0.504681	-0.669923	0.526097	-0.636538	0.898534	0.127886	0.0736153	-1.84431	0.0741406	-1.8408	0.879181	-0.153123	0.081699	-1.76131	0.493662	-0.687395	0.184008	1.33916	0.52665	0.639518	0.292475	1.0688	0.575067	0.565908	0.163207	1.40626	0.0365094	2.12399	0.317128	1.00616
	F3t.L	Inferior Frontal Gyrus, pars triangularis	0.782374	-0.278359	0.517721	-0.653475	0.536147	-0.624812	0.00371502	2.98192	0.440816	0.774363	0.0115415	-2.58052	0.186594	-1.34714	0.348745	-0.949763	0.848721	0.192168	0.242211	1.17749	0.89651	0.130452	0.227464	-1.2155	0.274578	1.10998	0.120144	1.59304	0.312999	1.0237	0.00124689	3.33709	0.00434434	2.92872	0.564341	-0.578619
	F3t.R	Inferior Frontal Gyrus, pars triangularis	0.94515	0.069294	0.410932	-0.832212	0.324485	-0.99935	0.458338	0.744904	0.135146	-1.50812	0.00669055	-2.77845	0.436073	-0.787875	0.280019	-1.09726	0.610944	-0.513333	0.798756	-0.255739	0.13137	-1.52306	0.10887	-1.61992	0.43805	0.784456	0.361194	0.925207	0.863008	0.173821	0.0829579	1.75397	0.0629465	1.8837	0.889979	0.138737
	F3o.L	Inferior Frontal Gyrus, pars opercularis	0.437329	-0.785702	0.0417362	-2.11375	0.1795	-1.36972	0.0492082	1.99468	0.759368	0.307276	0.0831165	-1.75305	0.196022	-1.31813	0.0343935	-2.20139	0.365792	-0.916277	0.550263	0.599703	0.904354	0.120514	0.619797	-0.49792	0.224647	1.23612	0.167435	1.40976	0.748151	0.32362	0.299782	1.04312	0.0227763	2.31834	0.389771	0.864352
	F3o.R	Inferior Frontal Gyrus, pars opercularis	0.596083	-0.534926	0.0131382	-2.61303	0.045961	-2.06933	0.890376	-0.138232	0.361667	-0.917021	0.358826	-0.922487	0.176421	-1.37973	0.00324454	-3.16036	0.0821516	-1.78974	0.19198	-1.31496	0.287498	-1.07018	0.826216	0.220219	0.351471	0.944337	0.326017	0.996145	0.896783	-0.130672	0.245303	1.16973	0.116228	1.58661	0.407021	0.833186
	PRG.L	Precentral Gyrus	0.0758841	-1.8293	0.0728447	-1.8495	0.618347	-0.502666	0.0317023	-2.18335	0.0810487	-1.76514	0.731443	0.344312	0.0415377	-2.11593	0.209785	-1.27764	0.750881	0.319986	0.00824755	-2.70366	0.432979	-0.787758	0.11942	1.57269	0.517124	-0.654412	0.46172	-0.744205	0.95938	-0.0512979	0.183557	-1.34055	0.0772931	-1.78778	0.550103	-0.599944
	PRG.R	Precentral Gyrus	0.69256	0.398668	0.583729	0.553073	0.872751	0.161343	0.384875	-0.873352	0.145395	-1.46916	0.44971	-0.759325	0.984237	0.0198988	0.384869	0.879986	0.35773	0.931984	0.133165	-1.51592	0.620128	-0.497449	0.428595	0.795315	0.281921	1.09286	0.00779366	2.82311	0.287012	1.08118	0.582752	0.55143	0.812076	0.238471	0.715576	-0.365567
	FMC.L	Frontal Medial Cortex	0.0216416	2.4041	1.2978e-06	5.82886	0.000711174	3.71233	0.0839732	1.74811	2.59925e-05	4.443	0.000854416	3.45442	0.129461	1.55283	1.00984e-06	5.9115	0.00044021	3.88072	0.391401	0.861371	3.70679e-05	4.34871	6.57871e-05	4.19383	0.270495	1.11963	0.0867225	1.76247	0.548542	0.605822	0.0262624	2.26086	0.0660303	1.86164	0.829705	-0.215727
	FMC.R	Frontal Medial Cortex	0.000271891	4.04771	2.6844e-06	5.5896	0.00492186	3.0021	0.05318	1.96014	4.3617e-06	4.90197	0.000408251	3.67667	0.00425995	3.05735	7.54111e-07	6.00778	0.00125031	3.51095	0.413817	0.821129	4.67284e-05	4.28657	0.000150988	3.96349	0.0361189	2.1794	0.00486704	3.0064	0.107771	1.65058	0.120106	1.56974	0.00319597	3.03249	0.0825095	1.75657
	SMC.L	Juxtapositional Lobule Cortex (formerly Supplementary Motor Cortex)	0.46426	-0.739959	0.0759956	1.82858	0.00165413	3.40951	0.215226	1.24842	4.9896e-06	4.86817	0.000429672	3.66155	0.378474	-0.892021	0.0367337	2.17179	0.0014563	3.45581	0.632164	0.480379	1.57561e-05	4.57416	5.95103e-05	4.22114	0.0306674	2.25246	1.71154e-05	4.97857	2.43765e-05	4.86128	0.131774	1.52145	8.92116e-07	5.2926	0.00205673	3.17751
	SMC.R	Juxtapositional Lobule Cortex (formerly Supplementary Motor Cortex)	0.980993	-0.0239949	0.0201377	2.43481	0.00415428	3.06692	0.127102	1.54036	1.92394e-05	4.52207	0.000770423	3.48609	0.791035	-0.267001	0.0152326	2.55201	0.00250743	3.25657	0.573877	0.564484	3.19066e-05	4.38868	7.64989e-05	4.15256	0.537687	0.622441	0.000143996	4.26521	0.000532001	3.81451	0.0173925	2.42464	6.40093e-08	5.91442	4.95349e-06	4.87
	SC.L	Subcallosal Cortex	0.0134284	2.60406	7.72296e-08	6.76388	0.000949582	3.60963	0.00603234	2.81498	5.16677e-07	5.42395	0.000395907	3.68572	0.0174635	2.49498	1.43122e-06	5.79663	0.00414711	3.06757	0.0415642	2.06847	5.64021e-06	4.83727	0.000477533	3.63021	0.325637	0.996939	0.00654452	2.89173	0.153749	1.45803	0.814737	0.235031	0.0003914	3.6891	0.00177535	3.22496
	SC.R	Subcallosal Cortex	0.000307423	4.00533	1.01975e-08	7.44763	0.000835483	3.65522	4.1633e-05	4.31761	9.98953e-08	5.81129	0.00777488	2.7249	0.00676196	2.87895	1.39817e-06	5.80432	0.00927762	2.75386	0.00782185	2.72273	5.23888e-06	4.85589	0.00238069	3.12988	0.0978807	1.70064	0.00664376	2.88585	0.108518	1.64696	0.00337219	3.01452	1.52639e-05	4.5824	0.0111601	2.59301
	FOC.L	Frontal Orbital Cortex	0.354817	0.937716	0.00759954	2.83307	0.0505389	2.02509	0.0590817	1.91266	0.000259231	3.80926	0.0160458	2.4558	0.457148	0.751882	0.0212935	2.41103	0.0927233	1.72844	0.133714	1.51375	7.37146e-05	4.16273	0.000847598	3.45688	0.0652099	-1.90361	0.193307	-1.32637	0.886254	-0.144092	0.938814	-0.0769828	0.304751	1.03239	0.289751	1.06516
	FOC.R	Frontal Orbital Cortex	0.0688299	1.87731	0.00587089	2.93403	0.174961	1.38453	0.982022	-0.022599	0.00633905	2.79753	0.0013591	3.30997	0.108054	1.64921	0.0235262	2.36824	0.194077	1.32402	0.491733	-0.690476	0.008935	2.67467	6.15548e-05	4.21195	0.775395	0.28754	0.303781	1.0437	0.589361	0.544777	0.165224	-1.39948	0.128595	1.53426	0.00282647	3.07337
Parietal lobe	POG.L	Postcentral Gyrus	0.239182	-1.19744	0.402715	-0.847062	0.793959	0.263175	0.0200487	-2.36902	0.0458774	-2.02553	0.936777	0.0795513	0.137173	-1.52128	0.53787	-0.622159	0.371076	0.906106	0.00204568	-3.17926	0.224494	-1.22337	0.128285	1.53552	0.619281	-0.501326	0.418995	0.817817	0.163475	1.4234	0.841564	0.200492	0.264604	1.12282	0.208921	1.26592
	POG.R	Postcentral Gyrus	0.859646	-0.178132	0.72599	0.353291	0.498391	0.684142	0.124098	-1.55281	0.0590916	-1.91258	0.518583	-0.648169	0.468911	-0.732217	0.762932	0.303994	0.183029	1.3584	0.0294038	-2.21456	0.28012	-1.08682	0.449171	0.760232	0.825659	0.221929	0.0291605	2.2747	0.0865934	1.76322	0.566281	0.575734	0.126085	1.54455	0.0893572	1.71798
	SPL.L	Superior Parietal Lobule	0.0412013	-2.11965	0.177388	-1.37657	0.573885	0.567666	0.0945888	-1.6901	0.397925	-0.849518	0.419422	0.811275	0.00938789	-2.74913	0.145709	-1.48799	0.313757	1.02208	0.00755449	-2.7352	0.362353	-0.915705	0.0902289	1.71325	0.438873	-0.783035	0.301276	1.0492	0.0390864	2.14367	0.983674	-0.0205216	0.00169917	3.23901	0.00110917	3.3737
	SPL.R	Superior Parietal Lobule	0.799085	-0.256476	0.674962	0.422891	0.443507	0.775065	0.0177566	-2.41658	0.0216494	-2.33859	0.574672	-0.563312	0.214238	-1.26498	0.977514	0.028388	0.251414	1.16621	0.000154486	-3.95702	0.0198432	-2.37308	0.476546	0.714963	0.111552	1.63244	0.00801284	2.81215	0.0553669	1.98207	0.925775	0.0934321	0.00818329	2.70648	0.00128807	3.32688
	SGa.L	Supramarginal Gyrus, anterior division	0.75158	-0.319056	0.0111573	-2.67963	0.00805106	-2.81026	0.930479	0.0874958	0.0254663	-2.27337	0.0106905	-2.60893	0.168882	-1.40484	0.00375011	-3.10576	0.024788	-2.34566	0.144624	-1.47202	0.00648018	-2.78976	0.109175	-1.6185	0.0661198	1.89688	0.156193	1.44916	0.628606	-0.487981	0.0127338	2.54374	0.074764	1.80355	0.310569	-1.01997
	SGa.R	Supramarginal Gyrus, anterior division	0.717485	-0.36476	0.00201162	-3.33792	7.80053e-05	-4.47257	0.861893	-0.174481	0.0295665	-2.21228	0.021485	-2.34162	0.139924	-1.51038	0.000664477	-3.73632	0.000582654	-3.78259	0.0503715	-1.98432	0.00705159	-2.75979	0.239301	-1.18486	0.448036	0.767321	0.394211	0.862635	0.840919	0.202216	0.0138038	2.51328	0.0936006	1.69527	0.335203	-0.969056
	SGp.L	Supramarginal Gyrus, posterior division	0.0220815	-2.39548	1.30244e-07	-6.58948	0.000116546	-4.33699	0.797268	-0.257673	2.80776e-10	-7.12893	3.17999e-11	-7.6009	0.00427457	-3.05605	1.13675e-07	-6.63481	0.000206176	-4.14273	0.0954545	-1.68561	2.14799e-09	-6.68152	9.29536e-09	-6.3542	0.448941	-0.76578	0.0526386	-2.00596	0.225635	-1.23343	0.138424	1.49542	0.00263605	-3.09642	1.17483e-06	-5.22583
	SGp.R	Supramarginal Gyrus, posterior division	0.114042	-1.62077	3.249e-09	-7.84091	1.40814e-06	-5.80198	0.0598862	-1.9065	8.49176e-10	-6.8865	1.99879e-06	-5.09582	0.0201176	-2.43523	1.38919e-08	-7.34227	1.56396e-05	-5.00843	0.00351333	-3.00075	3.25321e-10	-7.09678	7.05965e-05	-4.17456	0.972681	0.0344914	0.641402	-0.469814	0.558946	-0.590053	0.847416	-0.192991	0.00187007	-3.20825	0.000482257	-3.62728
	PCN.L	Precuneous Cortex	0.0078067	-2.82245	0.00023417	-4.09908	0.052728	-2.00516	0.00010418	-4.06732	1.53667e-08	-6.24066	0.0052643	-2.86254	0.00533936	-2.97075	0.000265262	-4.05621	0.145922	-1.48718	1.67587e-05	-4.5581	3.16336e-08	-6.07635	0.0883799	-1.72334	0.168846	-1.40496	0.46883	-0.732352	0.593031	0.539392	0.061395	-1.89514	0.418925	-0.812146	0.226431	1.21823
	PCN.R	Precuneous Cortex	0.001781	-3.38254	2.91523e-05	-4.8018	0.0259986	-2.32495	0.000788424	-3.47904	1.46577e-09	-6.76613	0.000458717	-3.64216	0.00113257	-3.54653	4.70492e-05	-4.64217	0.0896537	-1.74561	0.000143044	-3.97871	3.01372e-08	-6.08743	0.0211561	-2.34775	0.481713	-0.711135	0.0749787	-1.83525	0.211816	-1.27184	0.108856	-1.61998	0.00700569	-2.76212	0.0762559	-1.79419
	AG.L	Angular Gyrus	0.0791418	-1.80841	0.00413418	-3.06876	0.122709	-1.58172	0.359804	-0.920602	0.000374548	-3.70204	0.00272567	-3.08538	0.0089544	-2.76801	0.00368937	-3.11194	0.304389	-1.04236	0.0307581	-2.19592	4.89499e-05	-4.27404	0.0131152	-2.53262	0.266843	1.12836	0.505627	0.672587	0.60751	-0.5183	0.0013504	3.312	0.166017	1.39683	0.0133031	-2.52726
	AG.R	Angular Gyrus	0.0656294	-1.9005	0.000595514	-3.77492	0.00685063	-2.87385	0.0284888	-2.22758	4.67338e-08	-5.98689	0.00128874	-3.32672	0.00787913	-2.8188	0.000607789	-3.76774	0.0332574	-2.21642	0.00161532	-3.25518	1.81881e-08	-6.20244	0.0209659	-2.35133	0.210341	1.27605	0.994978	0.0063389	0.0777488	-1.81725	0.283312	1.07958	0.273111	-1.1029	0.0166161	-2.44233
Temporal lobe	TP.L	Temporal Pole	0.0306404	2.25285	9.67642e-05	4.39991	0.0190595	2.45814	0.463452	0.736427	0.00132578	3.3178	0.0010538	3.38964	0.321765	1.00506	0.0148404	2.56283	0.0571117	1.96732	0.818215	0.230538	0.00437043	2.92668	0.000592204	3.56582	0.540427	-0.618228	0.0200263	2.43717	0.0131157	2.61373	0.475398	-0.716831	0.387841	0.867893	0.119029	1.57438
	TP.R	Temporal Pole	0.00730092	2.84886	0.000136908	4.28237	0.0171254	2.50318	0.124553	1.55091	0.000239752	3.83178	0.0215548	2.34033	0.082688	1.78647	0.00265757	3.23497	0.0793785	1.80692	0.458955	0.743878	0.0168878	2.43605	0.056894	1.92977	0.568085	0.576322	0.255038	1.15717	0.380764	0.887695	0.837862	-0.205243	0.612245	0.508707	0.486253	0.699263
	T3a.L	Inferior Temporal Gyrus, anterior division	0.262692	1.13839	0.000271063	4.04876	0.000346692	3.96373	0.426157	-0.799536	9.5919e-06	4.70223	3.71312e-09	6.5598	0.723598	-0.356512	0.00621569	2.91184	0.000205292	4.14421	0.0708201	-1.82904	0.000212595	3.86628	3.00213e-09	6.60715	0.00811607	2.80708	0.00077357	3.68255	0.0724965	1.85186	0.0170749	2.43178	0.000663166	3.53166	0.0987761	1.66868
	T3a.R	Inferior Temporal Gyrus, anterior division	0.203973	1.29449	0.0001773	4.19433	6.66843e-05	4.52529	0.758636	-0.308241	2.23871e-08	6.15522	5.73008e-12	7.96866	0.327879	0.992266	2.00251e-05	4.92653	6.80705e-05	4.51838	0.21356	-1.25301	8.5459e-09	6.37312	2.02061e-14	9.17051	0.247602	1.17582	0.00192257	3.35454	0.0899206	1.74409	0.863798	-0.17205	6.85237e-07	5.35623	7.45573e-05	4.15961
	T3p.L	Inferior Temporal Gyrus, posterior division	0.249061	-1.17213	3.43999e-06	5.50796	5.96751e-07	6.085	0.254973	-1.14591	5.88057e-05	4.22437	1.38924e-07	5.73442	0.126028	-1.56736	3.03375e-05	4.78854	2.19846e-06	5.65533	0.0551738	-1.94362	6.64373e-05	4.19115	1.89818e-08	6.19274	0.456484	-0.753002	0.00155739	3.43145	0.00578657	2.93964	0.0134482	2.52316	0.00012196	4.02342	0.0223611	2.3257
	T3p.R	Inferior Temporal Gyrus, posterior division	0.266105	-1.13014	0.00034349	3.96695	3.71823e-05	4.72076	0.934762	-0.0820924	9.97912e-10	6.85097	1.0453e-10	7.34379	0.199145	-1.30876	0.0005476	3.80438	3.49257e-05	4.74164	0.361945	-0.916487	1.06526e-07	5.79635	1.83176e-11	7.71957	0.345586	0.956087	0.00165377	3.40959	0.0050758	2.99026	0.00208734	3.17272	1.81336e-06	5.11975	0.00113173	3.36742
	TO3.L	Inferior Temporal Gyrus, temporooccipital part	0.0570828	-1.96756	0.697892	0.391376	0.109526	1.6421	0.242783	-1.17605	0.160764	1.41457	0.00643077	2.79246	0.0374052	-2.1636	0.67352	0.424887	0.0441135	2.08829	0.0305549	-2.19867	0.108026	1.62385	0.000203879	3.87825	0.269677	1.12158	0.0471361	2.05762	0.176315	1.38008	0.361764	0.916834	0.0256162	2.27099	0.0746401	1.80433
	TO3.R	Inferior Temporal Gyrus, temporooccipital part	0.215324	-1.26192	0.0335949	2.21191	0.00353701	3.12787	0.715618	-0.36551	0.0261635	2.2624	0.00226801	3.14572	0.108205	-1.64847	0.0251142	2.33999	0.00101426	3.58608	0.249831	-1.1585	0.0137631	2.5144	3.51731e-05	4.36272	0.92025	-0.100844	0.000627296	3.75662	0.0012585	3.50859	0.00684421	2.7704	6.76116e-06	4.79139	0.0028894	3.06607
	TFa.L	Temporal Fusiform Cortex, anterior division	0.127921	1.55931	8.59328e-07	5.9647	0.00063217	3.75389	0.609154	0.513139	1.36241e-08	6.26791	6.13531e-11	7.45911	0.290462	1.07334	4.64446e-06	5.40912	0.000145579	4.26149	0.523797	-0.640089	2.85236e-08	6.1	9.05942e-14	8.85122	0.860197	-0.177426	0.00460519	3.0276	0.0221978	2.39323	0.704522	0.380472	2.45088e-05	4.45851	5.94305e-06	4.82406
	TFa.R	Temporal Fusiform Cortex, anterior division	0.0278613	2.29473	8.07125e-06	5.22699	0.00938048	2.74945	0.184693	1.33705	2.67239e-10	7.1397	3.25493e-09	6.58915	0.285247	1.08521	0.000128373	4.30422	0.00256592	3.24801	0.798238	0.256412	5.49384e-09	6.47227	9.70466e-11	7.35989	0.0209968	2.41702	0.00553086	2.95714	0.158919	1.43941	0.346341	0.946844	5.85065e-05	4.22576	0.0025167	3.11166
	TFp.L	Temporal Fusiform Cortex, posterior division	0.0109427	-2.68749	0.344244	0.958784	0.00360755	3.12041	8.99205e-05	-4.10807	0.7968	-0.25828	2.89962e-05	4.41407	0.00227386	-3.29277	0.270551	1.1195	0.00104972	3.57378	4.57198e-05	-4.29244	0.553927	0.594191	7.22933e-07	5.34334	0.00373704	-3.10708	0.34552	-0.956219	0.00858499	2.78479	0.0158197	-2.46125	0.00326236	-3.02562	0.792032	-0.264485
	TFp.R	Temporal Fusiform Cortex, posterior division	0.275268	-1.10835	0.0155038	2.54468	0.000126585	4.30898	0.0150054	-2.48151	0.00022013	3.8563	5.57389e-10	6.97896	0.104795	-1.66523	0.00437523	3.04717	1.53355e-05	5.01493	0.00336298	-3.01544	0.000876909	3.44644	3.58178e-11	7.57527	0.0241749	-2.3565	0.437247	0.785844	0.0105257	2.70318	0.441944	-0.772445	0.0616245	1.89343	0.0116134	2.5782
	T1a.L	Superior Temporal Gyrus, anterior division	0.736079	0.339744	0.821027	0.22793	0.878001	-0.15463	0.393211	-0.858071	0.701839	-0.384104	0.638672	0.471207	0.904674	0.12063	0.500653	0.68052	0.471777	0.727469	0.0679259	-1.84851	0.598727	-0.528169	0.148716	1.457	0.454448	0.756438	0.583847	0.552899	0.680218	-0.41563	0.737468	-0.336281	0.570257	0.569836	0.421214	0.80814
	T1a.R	Superior Temporal Gyrus, anterior division	0.25443	1.15868	0.069125	1.87522	0.283413	1.08942	0.807274	0.244688	0.881617	-0.149358	0.705613	-0.378998	0.375867	0.896963	0.0539896	1.994	0.109293	1.64322	0.276878	-1.09422	0.438438	-0.778412	0.710685	0.372151	0.173128	1.39059	0.303995	1.04323	0.661269	-0.441915	0.754201	0.314095	0.0508411	1.9802	0.108466	1.62179
	T1p.L	Superior Temporal Gyrus, posterior division	0.416148	-0.822879	0.158038	-1.44255	0.431503	-0.795817	0.00419652	-2.94055	0.000399469	-3.68308	0.291313	-1.06169	0.159773	-1.43638	0.547593	-0.607267	0.764812	0.301507	0.000134565	-3.99588	0.00133376	-3.31591	0.772028	0.290628	0.941861	-0.0734564	0.152588	1.46227	0.0759712	1.82874	0.562322	0.581627	0.855236	0.182985	0.702875	-0.382701
	T1p.R	Superior Temporal Gyrus, posterior division	0.964081	-0.0453564	0.167469	-1.40964	0.167254	-1.41038	0.654483	0.449091	0.0096472	-2.6467	0.000531535	-3.59825	0.441141	-0.779127	0.142669	-1.49966	0.381128	-0.88701	0.543648	-0.609702	0.0350183	-2.14164	0.0403159	-2.08162	0.811544	0.240243	0.904513	0.120835	0.897587	-0.129648	0.00340775	3.011	0.322136	0.995743	0.0335297	-2.15992
	T2a.L	Middle Temporal Gyrus, anterior division	0.287956	-1.07903	0.84922	0.191526	0.0590654	1.95127	0.162156	-1.40983	0.649121	0.456565	0.0468827	2.01602	0.0604698	-1.94001	0.986864	-0.0165821	0.025616	2.3314	0.012076	-2.56362	0.558583	0.58721	0.000632126	3.54616	0.493569	-0.691894	0.667074	0.433831	0.2998	1.05246	0.56291	0.58075	0.153078	1.44134	0.421927	0.806895
	T2a.R	Middle Temporal Gyrus, anterior division	0.531651	-0.631756	0.857917	0.180351	0.295658	1.06167	0.401301	-0.843431	0.954418	-0.0573244	0.310441	1.02025	0.198215	-1.31154	0.921204	-0.0996339	0.149355	1.47424	0.150815	-1.44942	0.462432	-0.738113	0.243751	1.17362	0.512352	-0.661929	0.459882	-0.747286	0.890758	-0.138348	0.243713	1.17371	0.637979	0.472182	0.595686	-0.532574
	T2p.L	Middle Temporal Gyrus, posterior division	0.0490176	-2.03939	0.0265717	-2.31545	0.937652	-0.0787855	0.0658547	-1.86287	2.24602e-05	-4.48149	0.0182194	-2.40656	0.00882571	-2.77378	0.0145725	-2.57036	0.700782	0.387433	0.00863408	-2.6871	1.79488e-05	-4.54022	0.0984705	-1.67022	0.636293	-0.477048	0.38747	-0.875129	0.569301	-0.574505	0.396735	0.851671	0.039531	-2.09006	0.00271537	-3.08663
	T2p.R	Middle Temporal Gyrus, posterior division	0.511319	-0.66356	0.063467	-1.91672	0.151785	-1.46523	0.00245221	-3.12018	9.24798e-10	-6.86772	0.00532586	-2.8585	0.152651	-1.46204	0.0541412	-1.99267	0.434832	-0.790028	0.000245106	-3.82542	4.23455e-09	-6.53048	0.0596937	-1.90797	0.561444	0.586288	0.326675	-0.994773	0.0958147	-1.71163	0.938506	-0.0773706	0.0023629	-3.13233	0.00123685	-3.33963
	TO2.L	Middle Temporal Gyrus, temporooccipital part	0.21543	-1.26162	1.49964e-05	-5.02233	0.000794992	-3.67287	2.54174e-05	-4.44891	9.10827e-13	-8.36093	1.45269e-05	-4.59525	0.0720509	-1.85489	2.10274e-05	-4.91033	0.00141541	-3.46613	1.00269e-06	-5.26431	9.89409e-12	-7.85173	0.000792926	-3.4773	0.992422	-0.00956642	0.222889	-1.24092	0.0791612	-1.80829	0.152681	-1.44275	0.00557994	-2.84227	0.12108	-1.56557
	TO2.R	Middle Temporal Gyrus, temporooccipital part	0.0323646	-2.22855	1.88177e-06	-5.70653	0.000144517	-4.26398	0.000481642	-3.62766	7.28306e-14	-8.8975	5.86452e-10	-6.96781	0.00558127	-2.95363	5.41363e-06	-5.35864	0.000590616	-3.77782	6.03466e-05	-4.21734	1.23679e-12	-8.29585	1.1551e-06	-5.22995	0.267071	-1.12781	0.00640629	-2.90007	0.0292862	-2.27281	0.999576	-0.000533198	0.0154738	-2.46974	0.0106894	-2.60897
	H.L	Heschl's Gyrus (includes H1 and H2)	0.251032	1.16717	0.915859	0.106417	0.427984	-0.801966	0.810823	0.240093	0.431667	-0.790015	0.192954	-1.31205	0.408323	0.836907	0.837565	-0.206541	0.401922	-0.848506	0.31524	-1.01012	0.148913	-1.45629	0.488808	-0.695159	0.935007	-0.0821354	0.00304701	3.18392	0.0395564	2.13824	0.169448	1.38548	0.00707865	2.75843	0.145915	1.46725
	H.R	Heschl's Gyrus (includes H1 and H2)	0.658249	0.446133	0.819435	-0.229995	0.554119	-0.597351	0.161308	1.41271	0.235741	-1.19395	0.000698981	-3.51572	0.937907	0.078462	0.422545	-0.811532	0.405466	-0.842071	0.863016	-0.173048	0.0329377	-2.16738	0.00327445	-3.02438	0.779636	0.281958	0.0863807	1.76446	0.146628	1.4845	0.135204	1.5079	0.0313573	2.18791	0.434029	0.785956
	PP.L	Planum Polare	0.290971	1.07219	0.589099	-0.545163	0.0788714	-1.81011	0.08975	1.71584	0.0371122	-2.11703	1.36474e-06	-5.18933	0.553082	0.598922	0.0617447	-1.92999	0.00686362	-2.87311	0.91577	0.106072	0.00246334	-3.1187	1.46412e-05	-4.59321	0.350073	0.947116	0.6186	0.502304	0.564862	-0.581152	0.13094	1.52478	0.52756	0.634284	0.140936	-1.48584
	PP.R	Planum Polare	0.0900892	1.74314	0.99543	0.00576842	0.0873176	-1.759	0.0148302	2.486	0.40282	-0.840702	1.08308e-05	-4.67105	0.190112	1.33618	0.303383	-1.04457	0.0167649	-2.51209	0.409434	0.828891	0.0373053	-2.11482	4.07036e-05	-4.32367	0.086116	1.76601	0.200066	1.30602	0.525199	-0.641777	0.000100487	4.07733	0.178513	1.3563	0.00149011	-3.28085
	PT.L	Planum Temporale	0.763384	0.303397	0.0646851	-1.90753	0.0170479	-2.50508	0.120769	-1.5669	5.36636e-05	-4.24919	0.00218622	-3.15769	0.722796	-0.357591	0.0560594	-1.97617	0.0615259	-1.93169	0.014914	-2.48384	0.000100926	-4.07613	0.0313403	-2.18813	0.801094	-0.253854	0.641295	-0.469965	0.913844	-0.108976	0.185254	-1.33532	0.0563321	-1.93425	0.422128	-0.806546
	PT.R	Planum Temporale	0.244846	1.18284	0.0916052	-1.73464	0.00148208	-3.44945	0.432239	-0.789031	0.00932163	-2.65924	0.0388577	-2.09742	0.40732	0.838718	0.113381	-1.62385	0.00578736	-2.93959	0.101206	-1.65659	0.00791119	-2.71865	0.211001	-1.26011	0.122624	1.58209	0.286979	-1.08125	0.023245	-2.37342	0.267076	1.11698	0.940338	-0.0750622	0.204911	-1.27725
Insula and operculum	FO.L	Frontal Operculum Cortex	0.411504	-0.831186	0.0579372	-1.96048	0.151545	-1.46611	0.0114397	2.58381	0.535546	-0.622034	0.00151558	-3.27547	0.0458621	-2.07033	0.0248964	-2.34377	0.205622	-1.28967	0.250242	1.15749	0.31684	-1.00677	0.02723	-2.24611	0.398312	-0.8551	0.790341	-0.26791	0.529982	0.634343	0.314056	1.01261	0.184137	1.33876	0.880424	0.150875
	FO.R	Frontal Operculum Cortex	0.99275	0.00915143	0.0325896	-2.22546	0.0131044	-2.61408	0.16211	1.40998	0.0617886	-1.89221	0.000894584	-3.4403	0.101305	-1.68285	0.00817912	-2.80401	0.0508897	-2.02184	0.973469	0.033353	0.023355	-2.30829	0.006343	-2.79731	0.994644	0.00676085	0.439254	0.782377	0.51813	0.652833	0.879623	-0.151893	0.469634	-0.726252	0.563162	-0.580375
	CO.L	Central Opercular Cortex	0.446382	0.770143	0.154228	-1.45628	0.0158371	-2.53584	0.14224	-1.48092	0.000895839	-3.43986	0.0772108	-1.78829	0.830462	0.215715	0.121591	-1.58663	0.0507163	-2.02344	0.0166102	-2.44246	0.000677567	-3.52516	0.339374	-0.960683	0.441449	0.778597	0.204762	1.29218	0.637484	0.475359	0.752181	-0.316764	0.757794	-0.309352	0.972589	-0.0344603
	CO.R	Central Opercular Cortex	0.761228	-0.306251	0.0362308	-2.17801	0.05614	-1.97549	0.607815	-0.515064	0.000999659	-3.406	0.00310839	-3.04177	0.440113	-0.780897	0.022786	-2.382	0.119618	-1.59538	0.192805	-1.3125	0.00100585	-3.40409	0.0180381	-2.41045	0.308312	-1.03382	0.867679	0.167835	0.318438	1.0121	0.978026	0.0276237	0.631302	-0.481597	0.4914	-0.691009
	PO.L	Parietal Operculum Cortex	0.638358	-0.474122	0.0244489	-2.35163	0.0144324	-2.57436	0.144728	-1.47163	0.000451861	-3.64663	0.0212661	-2.34569	0.437274	-0.785797	0.0222866	-2.39152	0.0484512	-2.04481	0.0164684	-2.44577	0.000363771	-3.71062	0.12094	-1.56617	0.751459	0.319218	0.0979811	1.70011	0.100574	1.68661	0.614385	-0.505645	0.827579	0.218464	0.481575	0.706808
	PO.R	Parietal Operculum Cortex	0.450133	-0.763753	0.0148949	-2.56131	0.11799	-1.60269	0.123876	-1.55374	0.0024316	-3.12295	0.148013	-1.45956	0.265852	-1.13074	0.0142322	-2.58012	0.240883	-1.19303	0.0209537	-2.35156	0.00511369	-2.8726	0.508589	-0.663777	0.323334	-1.00176	0.135442	-1.52823	0.421764	-0.812911	0.269723	-1.11078	0.461573	-0.739535	0.613272	0.507237
	INS.L	Insular Cortex	0.999527	0.0005967	0.27473	-1.10962	0.249856	-1.17013	0.213628	1.25282	0.0958697	-1.68347	0.000222166	-3.85366	0.40392	-0.844874	0.121773	-1.58583	0.266924	-1.12817	0.835285	0.208553	0.0578004	-1.92261	0.00373294	-2.9803	0.701934	0.385863	0.916013	0.106222	0.634446	-0.47967	0.147904	-1.45996	0.4187	-0.812539	0.415647	0.817903
	INS.R	Insular Cortex	0.696665	0.393052	0.349779	-0.947703	0.207663	-1.28375	0.0578365	1.92233	0.110144	-1.61402	5.1401e-06	-4.86069	0.746645	-0.325628	0.166831	-1.41182	0.210071	-1.27682	0.300359	1.04187	0.115392	-1.59031	0.000560281	-3.58247	0.944985	0.0695023	0.792221	0.26545	0.860723	0.176751	0.455084	-0.750325	0.622526	0.494036	0.142432	1.4802
	TOF.L	Temporal Occipital Fusiform Cortex	0.741223	-0.332863	0.601295	-0.527325	0.745732	-0.326845	0.0108856	-2.60224	0.393174	-0.858138	0.0695709	1.83736	0.348494	-0.950265	0.627346	-0.48978	0.753874	0.316008	0.000733103	-3.50123	0.317192	-1.00603	0.0161242	2.45392	0.162623	-1.42636	0.704613	-0.382215	0.37687	0.895059	0.669144	-0.428779	0.0153108	2.4738	0.00273708	3.084
	TOF.R	Temporal Occipital Fusiform Cortex	0.473638	0.724395	0.921954	-0.0986817	0.362239	-0.92317	0.0261124	-2.2632	0.845403	-0.19557	0.0328389	2.16864	0.970856	-0.0367964	0.670615	-0.428914	0.593739	-0.538355	0.000667029	-3.5299	0.633081	-0.479084	0.00211734	3.16809	0.688448	0.404306	0.835608	-0.209066	0.510345	-0.665101	0.504504	-0.670203	0.119127	1.57396	0.0207041	2.35631
Occipital lobe	OLs.L	Lateral Occipital Cortex, superior division	0.0112285	-2.67705	3.70235e-06	-5.48377	0.00213763	-3.31556	9.39057e-05	-4.09609	3.86646e-11	-7.55878	3.98273e-05	-4.3295	0.00335354	-3.14794	4.30679e-05	-4.67172	0.0217613	-2.40174	3.75052e-05	-4.34558	4.30597e-10	-7.03549	0.00459355	-2.90961	0.0537357	-1.99622	0.023024	-2.37754	0.534938	-0.626676	0.0619442	-1.89106	0.00256224	-3.10577	0.183521	-1.34066
	OLs.R	Lateral Occipital Cortex, superior division	0.00697661	-2.86671	7.01912e-06	-5.27305	0.000756382	-3.69052	1.02437e-05	-4.68537	5.86875e-11	-7.46871	8.45603e-05	-4.12502	0.00377314	-3.10344	2.5136e-05	-4.85108	0.00797786	-2.81388	1.28716e-06	-5.2036	4.23647e-09	-6.53038	0.0162871	-2.45004	0.875081	-0.158363	0.0123451	-2.6385	0.0393952	-2.14009	0.286843	-1.07165	0.00651335	-2.78795	0.0478849	-2.00672
	OLi.L	Lateral Occipital Cortex, inferior division	0.511364	-0.66349	0.0255352	-2.33277	0.0478628	-2.0505	0.000136737	-3.99138	1.1597e-08	-6.30431	0.004554	-2.91258	0.255423	-1.15622	0.046365	-2.06528	0.129594	-1.55227	2.13992e-06	-5.07901	5.61953e-08	-5.94445	0.144538	-1.47234	0.14896	-1.47572	0.169428	-1.40299	0.786711	0.272668	0.71498	0.366369	0.21791	-1.24109	0.112492	-1.6033
	OLi.R	Lateral Occipital Cortex, inferior division	0.443534	0.775018	0.411551	-0.831101	0.129289	-1.55355	0.00641768	-2.79318	2.2469e-06	-5.06698	0.0160917	-2.45469	0.9604	-0.0500088	0.326071	-0.996033	0.23472	-1.20912	0.000284013	-3.78283	5.21507e-06	-4.85704	0.230218	-1.20827	0.568193	0.576161	0.784062	-0.276144	0.425627	-0.806103	0.89588	-0.131251	0.589461	-0.541626	0.67515	-0.42051
	CALC.L	Intracalcarine Cortex	0.128513	-1.55681	0.000627017	-3.75677	0.0354158	-2.18825	0.422779	-0.80541	2.41096e-06	-5.04957	4.28569e-07	-5.4686	0.0486574	-2.04283	0.000936541	-3.61456	0.0670301	-1.89023	0.0895316	-1.71703	2.01635e-06	-5.09366	3.32535e-06	-4.96978	0.698774	0.390172	0.755323	0.314082	0.955601	-0.0560749	0.846926	0.193618	0.460478	-0.74135	0.320866	-0.998377
	CALC.R	Intracalcarine Cortex	0.175467	-1.38286	0.00163119	-3.4146	0.0422152	-2.10852	0.638703	-0.471165	6.02662e-07	-5.38708	1.04769e-08	-6.32723	0.0723521	-1.85284	0.00184453	-3.36972	0.0972893	-1.70377	0.166903	-1.39388	3.61222e-07	-5.50928	2.33e-07	-5.61305	0.918364	-0.103237	0.527785	0.637753	0.245708	1.18064	0.00266559	3.09274	0.561279	0.583183	0.00444712	-2.92072
	CN.L	Cuneal Cortex	0.434033	0.791415	0.0970674	-1.70494	0.0253638	-2.3357	0.783089	0.276148	2.88786e-06	-5.00486	2.22611e-10	-7.17953	0.930489	0.0878594	0.127852	-1.5596	0.0853749	-1.77038	0.241442	-1.17943	1.19412e-07	-5.76975	1.91251e-08	-6.19103	0.00710175	2.85973	4.88344e-05	4.62971	0.62665	0.490773	0.00223602	3.15035	0.0687916	1.84261	0.15895	-1.4208
	CN.R	Cuneal Cortex	0.988524	0.0144861	0.00381083	-3.09968	0.000101153	-4.38492	0.935929	-0.0806199	2.54623e-06	-5.03607	5.79565e-09	-6.4603	0.343142	-0.961006	0.00266403	-3.23406	0.00022599	-4.11128	0.217537	-1.2421	1.4243e-07	-5.72859	2.79117e-07	-5.57041	0.0749458	1.83547	0.0936513	1.72334	0.636774	-0.476366	0.00409932	2.94853	0.734528	0.340197	0.000539539	-3.59377
	OF.L	Occipital Fusiform Gyrus	0.632234	0.482815	0.0942689	-1.71998	0.022464	-2.38812	0.120891	-1.56637	0.0100437	-2.63193	0.149867	-1.45283	0.961379	0.0487717	0.082633	-1.78681	0.0476234	-2.05284	0.0117321	-2.57441	0.0043392	-2.92913	0.475605	-0.716494	0.051705	2.01438	0.18974	1.33734	0.364193	-0.919375	0.194134	1.30855	0.164828	1.40081	0.80688	0.245199
	OF.R	Occipital Fusiform Gyrus	0.669236	0.430827	0.634219	-0.479993	0.314129	-1.02128	0.798898	-0.255554	0.2589	-1.13642	0.247486	-1.1643	0.912288	-0.110953	0.524404	-0.643016	0.508244	-0.66843	0.20495	-1.27714	0.160457	-1.41562	0.692872	-0.396275	0.00172433	3.39435	0.0314444	2.24137	0.734687	-0.34161	0.0857504	1.73799	0.00014481	3.97525	0.0187994	2.3943
	SCLC.L	Supracalcarine Cortex	0.23361	-1.21206	0.000223464	-4.11514	0.000664834	-3.73613	0.0314692	-2.18642	1.89043e-10	-7.21511	2.5532e-09	-6.64316	0.066458	-1.8944	0.000377838	-3.93389	0.00393362	-3.08765	0.0012586	-3.33416	3.25564e-10	-7.09662	6.01381e-09	-6.45202	0.724829	-0.354853	0.383244	-0.883032	0.401555	-0.849174	0.7106	0.372266	0.143771	-1.47519	0.038814	-2.0979
	SCLC.R	Supracalcarine Cortex	0.489522	-0.698432	0.000761112	-3.68831	0.00178129	-3.38248	0.11732	-1.58182	1.09447e-08	-6.31738	1.20517e-07	-5.7676	0.165001	-1.41811	0.000936865	-3.61444	0.0108599	-2.69056	0.0129298	-2.53799	2.37379e-09	-6.65934	9.7338e-07	-5.2715	0.99828	0.00217164	0.776534	-0.28604	0.786643	-0.272757	0.591393	0.538811	0.138779	-1.49406	0.0265164	-2.25694
	OP.L	Occipital Pole	0.255915	1.155	0.0879223	-1.75551	0.00414458	-3.06781	0.734532	0.340192	0.0004202	-3.66814	2.21058e-07	-5.62545	0.734439	0.341943	0.0832771	-1.78291	0.0147639	-2.56497	0.236427	-1.19219	6.01853e-06	-4.82087	7.42521e-06	-4.76759	0.0041465	3.06763	0.218543	1.25292	0.0350211	-2.19328	0.0178317	2.41494	0.356683	0.926628	0.119338	-1.57305
	OP.R	Occipital Pole	0.512596	0.661544	0.576172	-0.564265	0.284197	-1.08762	0.415254	0.818595	0.0236591	-2.30309	7.77982e-05	-4.14794	0.778864	-0.282974	0.313485	-1.02266	0.414651	-0.825551	0.248945	-1.16068	0.000286554	-3.78025	0.000321563	-3.74671	0.0102061	2.7156	0.106065	1.65894	0.167939	-1.40804	0.017482	2.42264	0.0491559	1.99515	0.225798	-1.2199
	LG.L	Lingual Gyrus	0.249174	-1.17185	0.000147849	-4.25623	0.00127261	-3.50457	0.0310873	-2.1915	5.34572e-11	-7.48888	6.18518e-08	-5.92233	0.136426	-1.52428	0.00067641	-3.73004	0.010674	-2.69754	0.00832235	-2.7004	1.59216e-09	-6.74784	2.72686e-06	-5.01909	0.601654	-0.526803	0.0178365	-2.4861	0.0792738	-1.80758	0.0343758	-2.14944	5.29134e-05	-4.253	0.017553	-2.42107
	LG.R	Lingual Gyrus	0.360781	-0.926012	0.000216059	-4.12669	0.000976458	-3.59966	0.0205554	-2.35916	1.18851e-09	-6.81243	2.92062e-07	-5.55968	0.194192	-1.32368	0.00063716	-3.75112	0.0124075	-2.63644	0.003727	-2.98083	1.12923e-08	-6.31032	1.20056e-05	-4.64454	0.760334	-0.307436	0.0157339	-2.53856	0.0118191	-2.65624	0.867215	-0.167692	0.0079833	-2.71539	0.00171288	-3.23644
Limibc cortex	PAC.L	Paracingulate Gyrus	0.400045	-0.851929	0.044583	-2.08341	0.114921	-1.61671	0.198942	1.29443	0.529495	0.631308	0.42712	-0.797868	0.146969	-1.48321	0.0710818	-1.86155	0.319547	-1.00975	0.838878	0.203938	0.430787	0.791532	0.487244	0.697671	0.0549201	-1.98591	0.0207891	-2.42126	0.587121	-0.548073	0.995582	0.00555257	0.980391	-0.0246498	0.973259	-0.0336179
	PAC.R	Paracingulate Gyrus	0.34813	-0.950992	0.0223776	-2.38977	0.0779644	-1.81587	0.916877	0.104672	0.350037	-0.939575	0.233118	-1.20072	0.131292	-1.5452	0.0454993	-2.07401	0.269506	-1.12199	0.371224	-0.89883	0.45473	-0.750914	0.919104	0.101858	0.656592	-0.448451	0.566752	-0.578319	0.894188	-0.133978	0.157218	-1.42679	0.695136	-0.393197	0.290977	1.06244
	CGa.L	Cingulate Gyrus, anterior division	0.563584	0.583071	0.344565	-0.958138	0.136094	-1.52561	0.0568508	1.93011	0.441583	0.773058	0.209047	-1.26557	0.908407	-0.115884	0.313059	-1.02357	0.290149	-1.07405	0.471734	0.722812	0.754689	0.31345	0.699131	-0.387773	0.820495	-0.22862	0.140759	1.5071	0.113843	1.6217	0.587173	0.544964	0.20289	1.28303	0.287587	1.06998
	CGa.R	Cingulate Gyrus, anterior division	0.17757	1.37598	0.800982	-0.254	0.109919	-1.64021	0.0327658	2.16957	0.955809	0.0555732	0.0178331	-2.41491	0.310361	1.02938	0.820706	-0.228346	0.254713	-1.15798	0.342444	0.954561	0.976085	-0.0300639	0.300439	-1.04169	0.0376237	2.16097	0.0142175	2.58055	0.434965	0.789796	0.693805	0.395006	0.61973	0.498015	0.922262	0.0978678
	CGp.L	Cingulate Gyrus, posterior division	0.225049	-1.23502	0.109756	-1.641	0.467482	-0.734591	0.571423	-0.568111	0.0366852	-2.12195	0.13745	-1.49917	0.0398818	-2.13451	0.0714392	-1.85909	0.983367	-0.0209974	0.140955	-1.48577	0.0386103	-2.10015	0.635348	-0.475886	0.473432	0.724735	0.282268	1.09206	0.379115	0.890807	0.888592	0.140497	0.943315	-0.07131	0.866524	-0.168573
	CGp.R	Cingulate Gyrus, posterior division	0.273523	-1.11246	0.039182	-2.14256	0.132874	-1.53868	0.685138	-0.406822	0.0131087	-2.53281	0.0754538	-1.7992	0.0637907	-1.91426	0.035874	-2.18246	0.451125	-0.762067	0.144836	-1.47123	0.02764	-2.23999	0.54468	-0.608139	0.386479	0.876977	0.657185	0.447621	0.757411	-0.31131	0.360565	0.919138	0.218186	1.24034	0.878199	0.153704
	PHa.L	Parahippocampal Gyrus, anterior division	0.139634	1.51152	2.28913e-08	7.17284	4.73981e-06	5.40243	0.466233	0.731841	5.21395e-09	6.48398	1.24624e-07	5.75978	0.276952	1.10441	1.10142e-07	6.64534	7.17417e-06	5.26585	0.733464	0.341615	8.37282e-08	5.85228	2.58052e-08	6.12285	0.356451	0.934496	0.0712906	1.86011	0.145005	1.49067	0.906901	0.11729	0.000354007	3.7186	0.00053501	3.5963
	PHa.R	Parahippocampal Gyrus, anterior division	0.0334619	2.21368	1.55741e-05	5.00982	0.00209195	3.32352	0.0452974	2.0311	3.67869e-09	6.56188	1.08991e-06	5.24407	0.125635	1.56904	0.000230253	4.10487	0.00239697	3.27327	0.180312	1.35064	1.3936e-07	5.73369	2.64328e-07	5.58328	0.522192	-0.64647	0.0658827	1.89863	0.0563324	1.97386	0.0259462	2.26579	1.1908e-06	5.22255	0.00467101	2.90386
	PHp.L	Parahippocampal Gyrus, posterior division	0.113246	1.62448	0.0396945	2.13665	0.312068	1.0257	0.0226772	2.32009	0.0500334	1.98731	0.573254	-0.565404	0.667811	0.432806	0.486822	0.702812	0.718058	0.363986	0.197803	1.29775	0.106525	1.63091	0.844008	0.197358	0.563586	0.583068	0.155863	1.45036	0.392914	0.865028	0.21838	1.23981	0.211904	1.25759	0.720039	0.359571
	PHp.R	Parahippocampal Gyrus, posterior division	0.0308768	2.24945	0.0797678	1.80448	0.853324	0.18625	0.0013384	3.31482	0.0507949	1.9806	0.221538	-1.23127	0.328647	0.990668	0.317033	1.01508	0.679987	0.415948	0.207626	1.26956	0.425249	0.801113	0.559598	-0.585693	0.712103	-0.372044	0.515298	0.657283	0.492048	0.694347	0.0227485	2.31883	0.298376	1.04618	0.31704	-1.00635
Subcortex	Bst.L	Brain-Stem	0.303681	1.04392	0.00861098	2.78359	0.0367646	2.17141	0.335945	0.967563	0.000522603	3.60332	0.00661534	2.78246	0.522711	0.645659	0.0164426	2.5202	0.0313025	2.24338	0.397605	0.850097	8.40691e-05	4.12663	0.000376366	3.70062	0.74234	0.331371	0.0130857	2.61467	0.0624887	1.92422	0.842168	0.199718	0.000908379	3.43558	0.000779657	3.48246
	Bst.R	Brain-Stem	0.979675	0.0256593	0.219922	1.24909	0.197034	1.31508	0.277043	1.09384	0.000375412	3.70137	0.0123298	2.55584	0.861504	-0.175749	0.111223	1.634	0.0842535	1.77704	0.366517	0.907751	0.000101903	4.07345	0.000710842	3.51061	0.338161	-0.971103	0.020852	2.41997	0.00661564	2.88751	0.714357	0.367206	0.00675586	2.77501	0.0117477	2.57392
	Thal.L	Left Thalamus	0.501535	-0.679109	0.0362202	2.17814	0.00278464	3.21757	0.927972	0.0906589	2.11191e-06	5.08226	1.87426e-05	4.52891	0.484159	-0.707144	0.0253101	2.33662	0.00274251	3.22325	0.662761	-0.4376	1.27474e-06	5.20596	4.05613e-06	4.92017	0.0484671	-2.04466	0.352778	0.941745	0.0308566	2.24974	0.0264077	-2.25862	0.181062	1.3483	0.001852	3.21137
	Thal.R	Right Thalamus	0.44343	-0.775196	0.141424	1.5045	0.00713288	2.85801	0.554205	-0.593773	1.40597e-05	4.60372	1.48549e-05	4.58945	0.341461	-0.964402	0.0986502	1.6966	0.00682396	2.87538	0.435801	-0.782918	3.49702e-06	4.95723	7.9181e-06	4.75123	0.279082	-1.09944	0.490027	0.697615	0.03384	2.20866	0.0138326	-2.51249	0.313577	1.01362	0.0024887	3.11534
	Caud.L	Left Caudate	0.0070562	2.86226	0.000545288	3.80586	0.0445795	2.08344	2.14273e-06	5.07869	1.13021e-13	8.80407	1.33445e-05	4.61723	0.0300497	2.26146	0.000580886	3.78366	0.0123236	2.63921	0.000285523	3.78129	2.49578e-13	8.63607	4.72052e-07	5.44554	0.142749	1.49935	0.00642442	2.89897	0.0939513	1.72171	0.06326	1.88141	7.23877e-05	4.1677	0.154644	1.43581
	Caud.R	Right Caudate	0.0484944	2.04439	0.014459	2.57359	0.0869264	1.76128	7.094e-05	4.17323	2.41362e-13	8.64332	4.09384e-06	4.91785	0.184614	1.35337	0.00718693	2.85505	0.0146665	2.5677	0.000857316	3.45338	6.60361e-13	8.42938	2.15198e-07	5.63177	0.635692	-0.477901	0.0426749	2.10355	0.0243827	2.3528	0.0339059	2.15523	3.7772e-06	4.93799	0.0140046	2.5078
	Put.L	Left Putamen	0.282227	1.09215	0.338436	0.970542	0.968676	0.0395508	4.0921e-05	4.32224	3.72495e-06	4.94147	0.250397	1.15711	0.764941	0.301336	0.157338	1.44505	0.22237	1.24234	0.000137959	3.98888	4.23024e-07	5.4717	0.0100378	2.63214	0.643199	-0.467275	0.349127	-0.949002	0.626495	-0.490994	0.537006	0.619805	0.909634	0.113831	0.529615	-0.631122
	Put.R	Right Putamen	0.148674	1.47679	0.486504	0.703328	0.540008	-0.618872	2.87903e-05	4.41596	2.00149e-05	4.51173	0.52936	0.631514	0.435569	0.78875	0.182001	1.36168	0.405391	0.842207	7.80265e-05	4.14714	9.64083e-07	5.27382	0.0294551	2.21384	0.233364	1.21271	0.0230728	-2.37662	0.00440411	-3.04466	0.167384	1.39229	0.18318	-1.34172	0.0125459	-2.54932
	Pall.L	Left Pallidum	0.294069	-1.06522	0.367155	0.913644	0.0461269	2.06766	0.965735	0.0430819	1.09269e-05	4.66878	1.01165e-05	4.68858	0.55724	-0.592629	0.0471346	2.05763	0.00472902	3.01743	0.850774	-0.188691	2.68524e-06	5.0229	2.22044e-06	5.0699	0.00337393	-3.14566	0.762349	0.304767	0.0168421	2.51016	0.035378	-2.13732	0.285083	1.07559	0.00539786	2.85383
	Pall.R	Right Pallidum	0.846468	-0.195068	0.0311829	2.24507	0.0141215	2.58334	0.0757761	1.79719	1.37407e-06	5.18767	0.000202854	3.87969	0.970372	0.0374087	0.00558167	2.9536	0.00384587	3.09621	0.240537	1.18172	4.48719e-07	5.45764	2.06789e-05	4.50318	0.402703	-0.847084	0.0348038	2.19608	0.000745941	3.69544	0.841983	-0.199954	0.0571476	1.92776	0.0618221	1.89196
	Hip.L	Left Hippocampus	0.548222	-0.606309	0.0396146	2.13757	0.00566591	2.9478	0.219364	1.23714	0.000112567	4.04578	0.00603035	2.8151	0.576931	-0.563138	0.0219913	2.39724	0.0101086	2.71946	0.314268	1.01216	2.02798e-05	4.50829	0.00031309	3.7545	0.0638322	-1.91395	0.034105	-2.20517	0.967662	-0.0408315	0.463693	-0.736029	0.68611	-0.405494	0.794885	0.260771
	Hip.R	Right Hippocampus	0.199673	1.30718	0.00915038	2.75937	0.0334677	2.2136	0.00233197	3.13664	0.000183406	3.90841	0.362649	0.915138	0.299047	1.05413	0.00830032	2.79818	0.0138456	2.59148	0.0130644	2.53409	6.25252e-05	4.20769	0.0358787	2.13137	0.251294	-1.16651	0.314668	-1.02013	0.975962	0.0303478	0.701201	0.384967	0.183299	1.34135	0.268018	1.11477
	Amy.L	Left Amygdala	0.00304041	3.18473	4.52848e-05	4.65495	0.123419	1.57862	2.76157e-08	6.10738	1.57544e-10	7.25475	0.0442951	2.04087	0.00462505	3.02595	4.62524e-05	4.64788	0.0756485	1.83085	1.01005e-06	5.26253	4.85465e-11	7.50968	0.000546684	3.58983	0.0310746	2.24662	0.00375514	3.10525	0.164599	1.4195	0.000283334	3.78353	0.000998305	3.40642	0.926644	0.092335
	Amy.R	Right Amygdala	0.00375158	3.10561	0.000264211	4.05758	0.0731071	1.84773	4.46543e-07	5.4588	5.88935e-10	6.96689	0.015132	2.4783	0.00427849	3.0557	0.000375965	3.93562	0.0618765	1.92896	0.000240531	3.83084	5.6754e-09	6.46499	0.00151609	3.27536	0.00602152	2.92419	0.0183247	2.47474	0.69634	0.393496	0.0485908	2.00026	0.000216864	3.86058	0.0180065	2.41114
	Accbns.L	Left Accumbens	0.00148117	3.44967	1.9534e-06	5.69423	0.00458864	3.02897	0.00412325	2.94655	3.09657e-11	7.60663	1.5032e-06	5.16572	0.00533753	2.97089	6.40001e-07	6.06191	0.00270859	3.22789	0.0125995	2.54772	9.54636e-12	7.85939	1.42526e-07	5.72844	0.198524	1.31061	0.0257495	2.32914	0.296688	1.05937	0.703528	-0.381817	5.99233e-05	4.21926	0.000401724	3.68142
	Accbns.R	Right Accumbens	0.0429515	2.10058	1.04234e-06	5.90107	0.000703144	3.71634	0.00152578	3.27334	5.27158e-11	7.49189	1.82656e-05	4.53565	0.033245	2.21658	1.01425e-06	5.91007	0.000456062	3.86838	0.00975909	2.64247	1.37346e-11	7.78139	4.9203e-07	5.43564	0.162453	1.42696	0.00559155	2.95292	0.0388344	2.14661	0.810766	0.240167	0.0363524	2.12582	0.094767	1.68917
Bold: Significant difference (p < 0.009).
